# Supplementary material
Source: PubMed Central journal article supplement (PMC3003415)
Supplement: supp_M110.167585_jbc.M110.167585-1.pdf [file supp_M110.167585_jbc.M110.167585-1.pdf]

## Legends to Supplementary Figures

**Suppl. Fig. 1. Nucleotide sequence located between -1748 and -1541 of the hAGT gene contains glucocorticoid induced promoter activity.** (A) Deletion constructs containing 2572, 1748, 1651, 1618, 1598, 1541, 1457 and 1223 nucleotides from the transcription initiation site were attached to the luciferase gene. (B) These deletion constructs were transfected in HepG2 cells along with RSV-GR and promoter activity was determined in the absence or presence of Dex. Graph shows Dex induced promoter activity.

**Suppl. Fig. 2. (A) Nucleotide sequence located between -1714 and -1530 of the hAGT gene contains binding sites of multiple transcription factors.** Binding sites of HNF-3, HNF-1, GR, SP1 and C/EBP are underlined. (B) Nucleotide sequence around 1.6 Kb upstream from the transcriptional initiation site of the hAGT gene has 3 new SNPs. Chromatogram shows A/G polymorphism at -1670, G/C polymorphism at -1562 and G/K polymorphism at -1561 (K contains either G or T). SNPs are also shown by an asterisk in Fig. 3A.

**Suppl. Fig. 3. Position of hAGT gene in 180 Kb hAGT-BAC:** 180 Kb BAC DNA contains 116 Kb of 5'-flanking region, all 5 exons and 4 introns, and 54 Kb of 3'- non coding region of the hAGT gene. Extended picture of exons and introns is shown in the second line.

**Suppl. Fig. 4. Plasma angiotensin-II level is increased in double transgenic mice containing -6A haplotype of the hAGT gene as compared to -6G haplotype.** Plasma angiotensin-II level in non-transgenic control (CON) and double transgenic mice containing either -6G or -6A haplotype of the hAGT gene was determined by ELISA as described in Materials and Methods.

**Suppl. Fig. 5. Mouse and human renin mRNA levels are decreased in the kidney of double transgenic mice containing -6G and -6A haplotype of the hAGT gene.** The mouse and human kidney mRNA level in double transgenic animals were determined by Q RT-PCR as described in experimental section. (A) Mouse renin mRNA level in kidney of transgenic animals containing -6G or -6A haplotype are shown by assuming renin level in the kidney of PAC-hRen mice as one (marked CON). (B) Human renin mRNA level in kidney of transgenic animals containing -6G or -6A haplotype are shown by assuming renin level in the kidney of C57BL6 mice as one (marked CON in the figure)

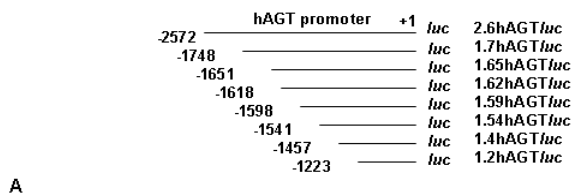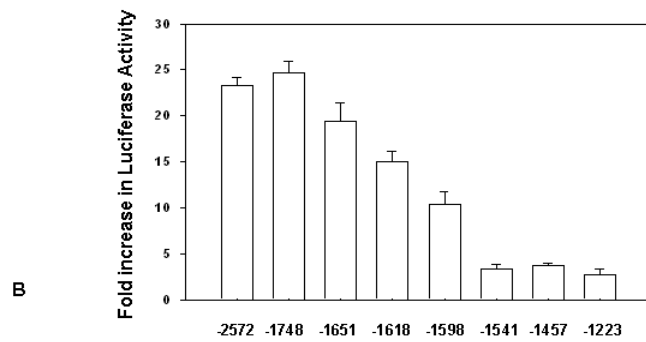

Supplemental Figure 1

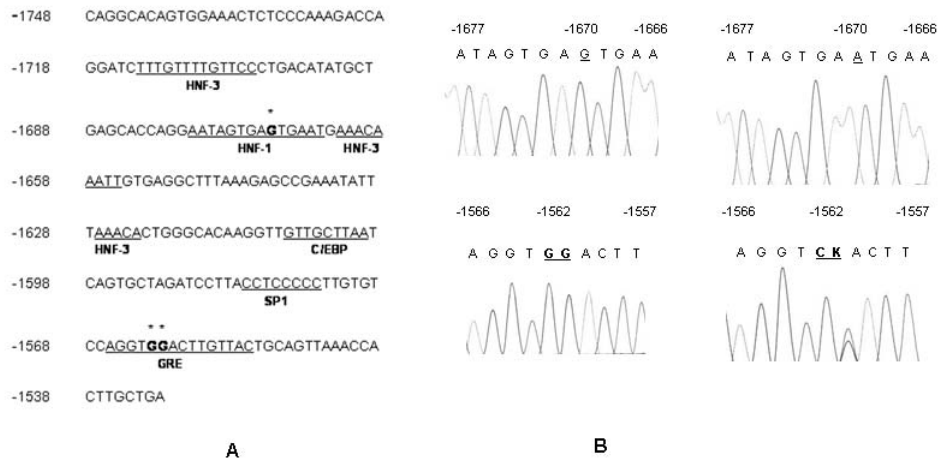

Supplemental Figure 2

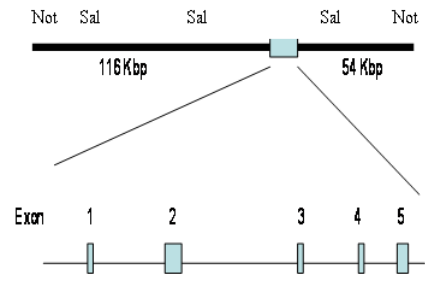

Supplemental Figure 3

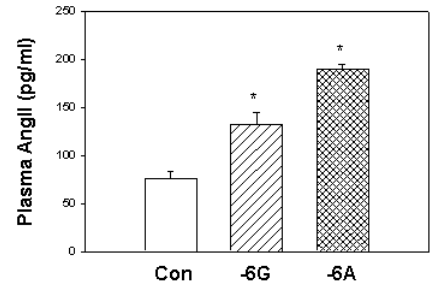

Supplemental Figure 4

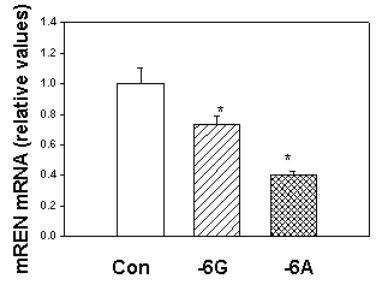

A

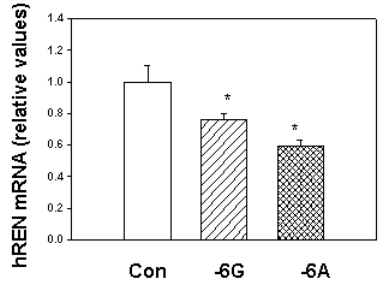

B

Supplemental Figure 5
